# Supplementary material for: Adaptive genomic structural variation in the grape powdery mildew pathogen, Erysiphe necator
Source: PubMed Central journal article supplement (PMC4298948; doi:10.1186/1471-2164-15-1081), 2014-12-09

**A**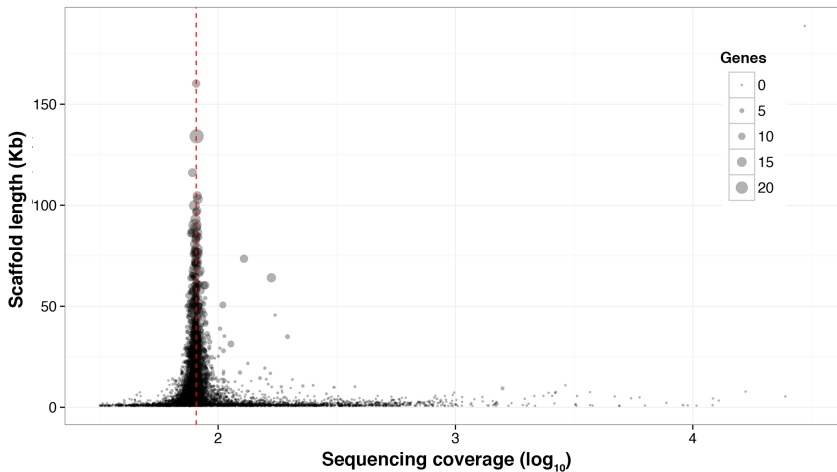**B**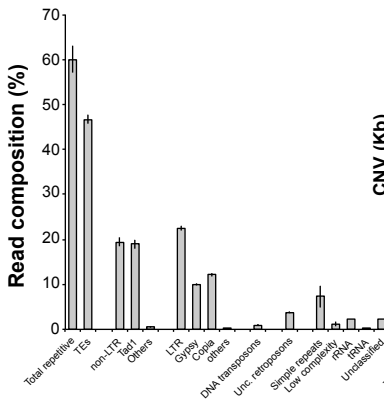**C**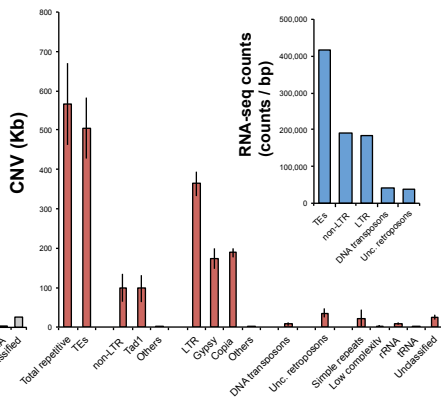**D**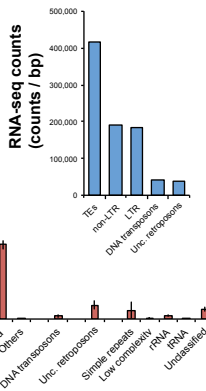

Supplement: 12864_2014_6773_MOESM6_ESM.pdf [file 12864_2014_6773_MOESM6_ESM.pdf]
