# Supplementary material for: Adaptive genomic structural variation in the grape powdery mildew pathogen, Erysiphe necator
Source: PubMed Central journal article supplement (PMC4298948; doi:10.1186/1471-2164-15-1081), 2014-12-09
Supplement: 12864_2014_6773_MOESM15_ESM.pdf [file 12864_2014_6773_MOESM15_ESM.pdf]

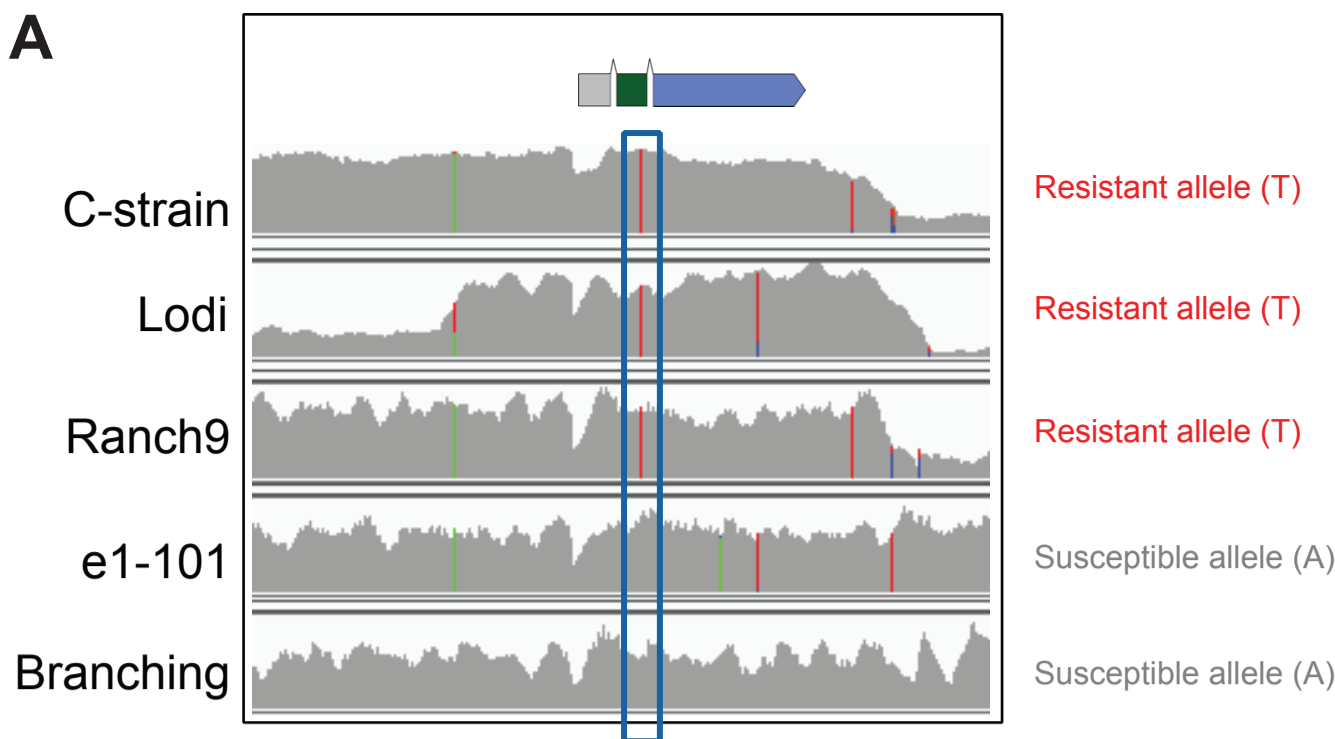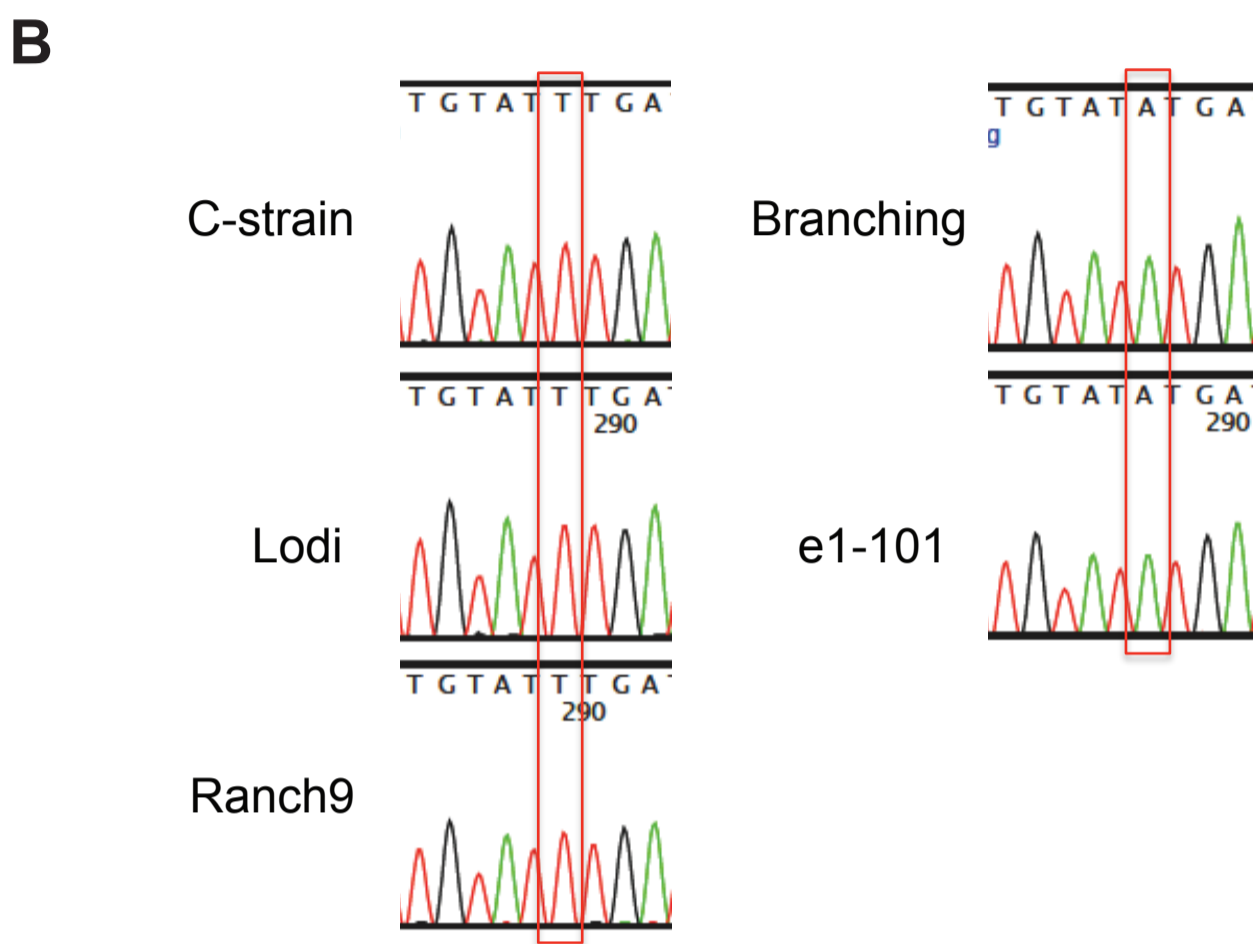

**C**

```

C-strain MYIADILSDLLTQQTTRYGWIFMVTSIAFSIILLAVGLNVLSQLLFRPPYPPVVFHWFP 60
Lodi MYIADILSDLLTQQTTRYGWIFMVTSIAFSIILLAVGLNVLSQLLFRPPYPPVVFHWFP 60
Ranch9 MYIADILSDLLTQQTTRYGWIFMVTSIAFSIILLAVGLNVLSQLLFRPPYPPVVFHWFP 60
e1-101 MYIADILSDLLTQQTTRYGWIFMVTSIAFSIILLAVGLNVLSQLLFRPPYPPVVFHWFP 60
Branching MYIADILSDLLTQQTTRYGWIFMVTSIAFSIILLAVGLNVLSQLLFRPPYPPVVFHWFP 60
*****

C-strain IIGSTISYGIDPYKIFYDCRAKYGDIPTFILLGKKVTVYLGQLQNNFILNGKCLKDVNAEE 120
Lodi IIGSTISYGIDPYKIFYDCRAKYGDIPTFILLGKKVTVYLGQLQNNFILNGKCLKDVNAEE 120
Ranch9 IIGSTISYGIDPYKIFYDCRAKYGDIPTFILLGKKVTVYLGQLQNNFILNGKCLKDVNAEE 120
e1-101 IIGSTISYGIDPYKIFYDCRAKYGDIPTFILLGKKVTVYLGQLQNNFILNGKCLKDVNAEE 120
Branching IIGSTISYGIDPYKIFYDCRAKYGDIPTFILLGKKVTVYLGQLQNNFILNGKCLKDVNAEE 120
*****

C-strain IYTNLTPVFGRDVVFDCPNSKLMQKQKFMKTALTIEAFHSYVTIIQNEVEAYINNCVSF 180
Lodi IYTNLTPVFGRDVVFDCPNSKLMQKQKFMKTALTIEAFHSYVTIIQNEVEAYINNCVSF 180
Ranch9 IYTNLTPVFGRDVVFDCPNSKLMQKQKFMKTALTIEAFHSYVTIIQNEVEAYINNCVSF 180
e1-101 IYTNLTPVFGRDVVFDCPNSKLMQKQKFMKTALTIEAFHSYVTIIQNEVEAYINNCVSF 180
Branching IYTNLTPVFGRDVVFDCPNSKLMQKQKFMKTALTIEAFHSYVTIIQNEVEAYINNCVSF 180
*****

C-strain QGESGTVNISKVMAEITITYTASHALQGEVRENFDSSFAALYHDLDMGFPTPINFTFYWAP 240
Lodi QGESGTVNISKVMAEITITYTASHALQGEVRENFDSSFAALYHDLDMGFPTPINFTFYWAP 240
Ranch9 QGESGTVNISKVMAEITITYTASHALQGEVRENFDSSFAALYHDLDMGFPTPINFTFYWAP 240
e1-101 QGESGTVNISKVMAEITITYTASHALQGEVRENFDSSFAALYHDLDMGFPTPINFTFYWAP 240
Branching QGESGTVNISKVMAEITITYTASHALQGEVRENFDSSFAALYHDLDMGFPTPINFTFYWAP 240
*****

C-strain LPWNRARDHAQRTVARTYMNIIQARREEKRSGENKHDIMWELMRSTYKDGTPVPDREIAH 300
Lodi LPWNRARDHAQRTVARTYMNIIQARREEKRSGENKHDIMWELMRSTYKDGTPVPDREIAH 300
Ranch9 LPWNRARDHAQRTVARTYMNIIQARREEKRSGENKHDIMWELMRSTYKDGTPVPDREIAH 300
e1-101 LPWNRARDHAQRTVARTYMNIIQARREEKRSGENKHDIMWELMRSTYKDGTPVPDREIAH 300
Branching LPWNRARDHAQRTVARTYMNIIQARREEKRSGENKHDIMWELMRSTYKDGTPVPDREIAH 300
*****

C-strain MMIALLMAGQHSSSSTSSWIMLWLAARPDIMEELYEEQLRIFGSEKFPFPLOYEDLSKLQ 360
Lodi MMIALLMAGQHSSSSTSSWIMLWLAARPDIMEELYEEQLRIFGSEKFPFPLOYEDLSKLQ 360
Ranch9 MMIALLMAGQHSSSSTSSWIMLWLAARPDIMEELYEEQLRIFGSEKFPFPLOYEDLSKLQ 360
e1-101 MMIALLMAGQHSSSSTSSWIMLWLAARPDIMEELYEEQLRIFGSEKFPFPLOYEDLSKLQ 360
Branching MMIALLMAGQHSSSSTSSWIMLWLAARPDIMEELYEEQLRIFGSEKFPFPLOYEDLSKLQ 360
*****

C-strain LHQNVLKEVLRHLHAPIHSIMRKVKNPMIVPGTKYVIPTSHVLISSPGCTSQDATFFPDPL 420
Lodi LHQNVLKEVLRHLHAPIHSIMRKVKNPMIVPGTKYVIPTSHVLISSPGCTSQDATFFPDPL 420
Ranch9 LHQNVLKEVLRHLHAPIHSIMRKVKNPMIVPGTKYVIPTSHVLISSPGCTSQDATFFPDPL 420
e1-101 LHQNVLKEVLRHLHAPIHSIMRKVKNPMIVPGTKYVIPTSHVLISSPGCTSQDATFFPDPL 420
Branching LHQNVLKEVLRHLHAPIHSIMRKVKNPMIVPGTKYVIPTSHVLISSPGCTSQDATFFPDPL 420
*****

C-strain KWDPHRWDIGSGKVLGNDVAVDEKYDYGGLTSTGASSPYLPFGAGRHRHCIGEQQFATLQLV 480
Lodi KWDPHRWDIGSGKVLGNDVAVDEKYDYGGLTSTGASSPYLPFGAGRHRHCIGEQQFATLQLV 480
Ranch9 KWDPHRWDIGSGKVLGNDVAVDEKYDYGGLTSTGASSPYLPFGAGRHRHCIGEQQFATLQLV 480
e1-101 KWDPHRWDIGSGKVLGNDVAVDEKYDYGGLTSTGASSPYLPFGAGRHRHCIGEQQFATLQLV 480
Branching KWDPHRWDIGSGKVLGNDVAVDEKYDYGGLTSTGASSPYLPFGAGRHRHCIGEQQFATLQLV 480
*****

C-strain TIMATMVRFFFRNIDGKQGVVKT DYSSLFSMPLAPALIGWEKR 523
Lodi TIMATMVRFFFRNIDGKQGVVKT DYSSLFSMPLAPALIGWEKR 523
Ranch9 TIMATMVRFFFRNIDGKQGVVKT DYSSLFSMPLAPALIGWEKR 523
e1-101 TIMATMVRFFFRNIDGKQGVVKT DYSSLFSMPLAPALIGWEKR 523
Branching TIMATMVRFFFRNIDGKQGVVKT DYSSLFSMPLAPALIGWEKR 523
*****

```
